# Supplementary material for: Avelumab expanded access program in metastatic Merkel cell carcinoma: Efficacy and safety findings from patients in Europe and the Middle East
Source: PubMed Central journal article supplement — Int J Cancer. 2021 Aug 3;149(11):1926–34. doi: 10.1002/ijc.33746 (PMC9291083; doi:10.1002/ijc.33746), 2021-08-03

## Supplement

### **Avelumab expanded access program in metastatic Merkel cell carcinoma: efficacy and safety findings from patients in Europe and the Middle East**

Paolo Antonio Ascierto, Kristina Orlova, Giovanni Grignani, Monika Dudzisz- Śledź, Eyal Fenig, Vanna Chiarion Sileni, Nicola Fazio, Mahtab Samimi, Laurent Mortier, Christoffer Gebhardt, Nora Kramkimel, Neil Steven, Oliver Bechter, Ana Arance, Elena Benincasa, Lenka Kostkova, Nuno Costa, and Paul Lorigan

## Contents

|                                                                                                                                                    |   |
|----------------------------------------------------------------------------------------------------------------------------------------------------|---|
| <b>Supplementary Table 1.</b> Summary of requests for avelumab from patients enrolled in the avelumab mMCC EAP in Europe and the Middle East ..... | 2 |
| <b>Supplementary Figure 1.</b> Complete response with avelumab. ....                                                                               | 3 |
| <b>Supplementary Figure 2.</b> Complete response with avelumab after initial disease progression. ....                                             | 5 |

**Supplementary Table 1.** Summary of requests for avelumab from patients enrolled in the avelumab mMCC EAP in Europe and the Middle East

| Country            | Official requests, n | Not approved, n | Withdrawn preapproval, n | Approved, n | Withdrawn postapproval but presupply, n | Drug supplied, n | Evaluable for response data, n |
|--------------------|----------------------|-----------------|--------------------------|-------------|-----------------------------------------|------------------|--------------------------------|
| Austria            | 3                    | -               | -                        | 3           | 1                                       | 2                | 2                              |
| Belgium            | 37                   | 3               | 1                        | 33          | 1                                       | 32               | 16                             |
| Denmark            | 2                    | -               | -                        | 2           | -                                       | 2                | 2                              |
| France             | 96                   | 8               | 2                        | 86          | 3                                       | 83               | 24                             |
| Germany            | 27                   | 4               | 1                        | 22          | 2                                       | 20               | 7                              |
| Greece             | 8                    | -               | -                        | 8           | 2                                       | 6                | 3                              |
| Hungary            | 2                    | 1               | -                        | 1           | -                                       | 1                | -                              |
| Ireland            | 2                    | 1               | -                        | 1           | -                                       | 1                | 1                              |
| Israel             | 13                   | -               | -                        | 13          | 2                                       | 11               | 7                              |
| Italy              | 109                  | 5               | 2                        | 102         | 7                                       | 95               | 55                             |
| Lebanon            | 4                    | -               | -                        | 4           | 2                                       | 2                | 1                              |
| Netherlands        | 8                    | -               | -                        | 8           | 1                                       | 7                | 3                              |
| Norway             | 2                    | 1               | -                        | 1           | -                                       | 1                | 1                              |
| Poland             | 10                   | -               | -                        | 10          | -                                       | 10               | 5                              |
| Portugal           | 4                    | -               | -                        | 4           | -                                       | 4                | 2                              |
| Qatar              | 1                    | -               | -                        | 1           | -                                       | 1                | -                              |
| Russian Federation | 11                   | -               | -                        | 11          | 1                                       | 10               | 4                              |
| Spain              | 17                   | 3               | 2                        | 12          | 2                                       | 10               | 6                              |
| Switzerland        | 7                    | -               | -                        | 7           | 2                                       | 5                | 2                              |
| Turkey             | 11                   | -               | -                        | 11          | -                                       | 11               | 5                              |
| United Kingdom     | 29                   | 2               | -                        | 27          | 6                                       | 21               | 4                              |
| Total              | 403                  | 28              | 8                        | 367         | 32                                      | 335              | 150                            |

Abbreviations: EAP, expanded access program; mMCC, metastatic Merkel cell carcinoma.

**Supplementary Figure 1. Complete response with avelumab.** Computed tomography scans of a 75-year-old female patient with MCPyV- metastatic Merkel cell carcinoma that progressed after chemotherapy and somatostatin analogues: (A) at baseline (March 2017); (B) after 3 months of avelumab treatment (June 2017); and (C) complete response achieved after 12 months of avelumab treatment (February 2018). Images were provided by Prof Samimi. MCPyV-, Merkel cell polyomavirus negative.

**(A)**

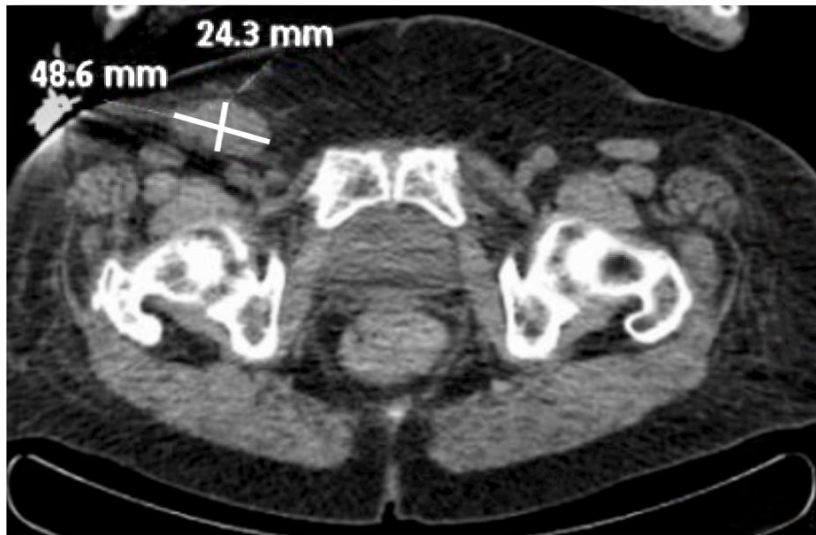

**(B)**

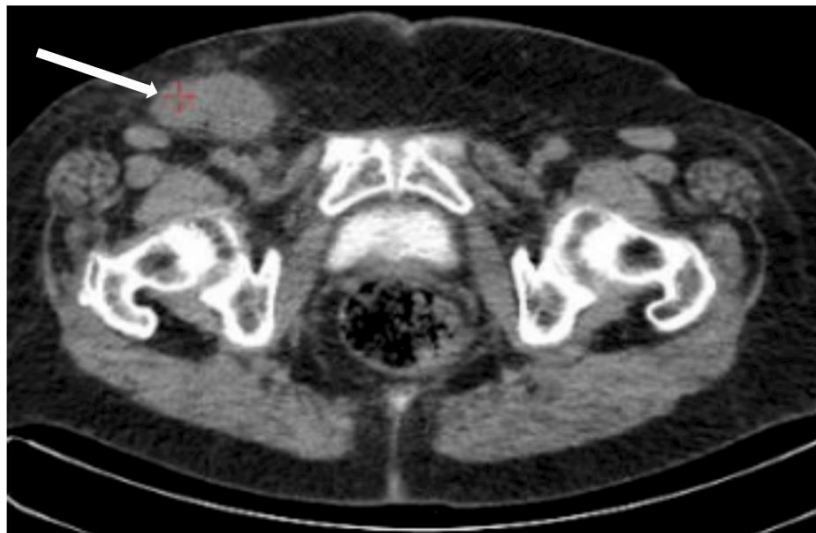

(C)

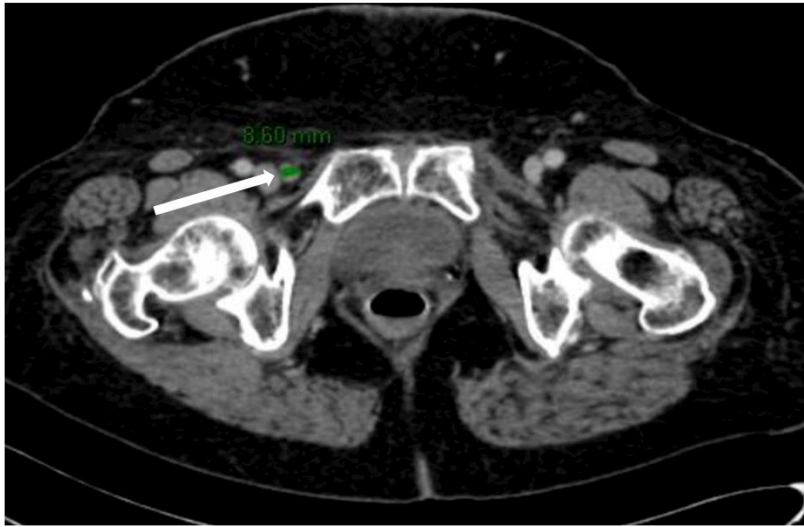

**Supplementary Figure 2. Complete response with avelumab after initial disease progression.** Computed tomography and positron emission tomography–computed tomography scans of a female patient (born 1959) with MCPyV+ metastatic Merkel cell carcinoma: (A) at baseline (December 2017); (B) with disease progression after 7 cycles of avelumab (February 2018); (C) with partial response (May 2018); and (D) with complete response (August 2018). At the last follow-up, the patient had an ongoing complete response after 46 cycles of avelumab (treatment was stopped in December 2019). Images were provided by Dr Orlova. MCPyV+, Merkel cell polyomavirus positive.

**(A)**

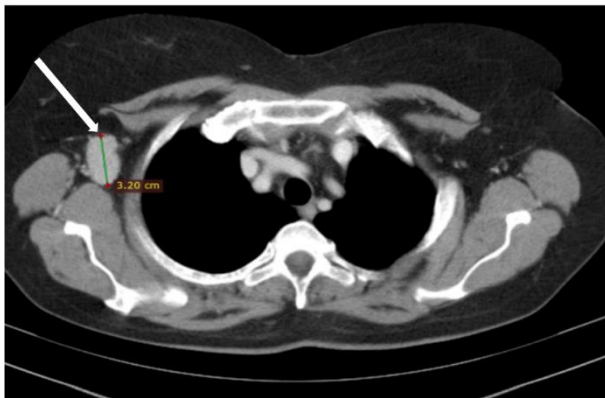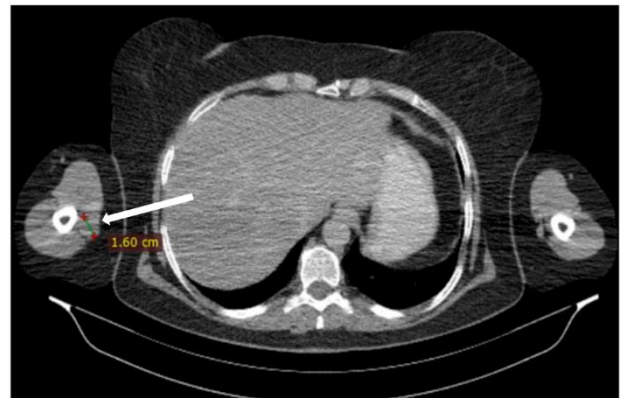

**(B)**

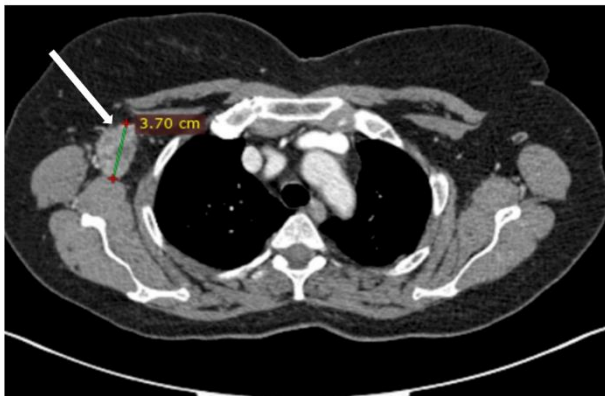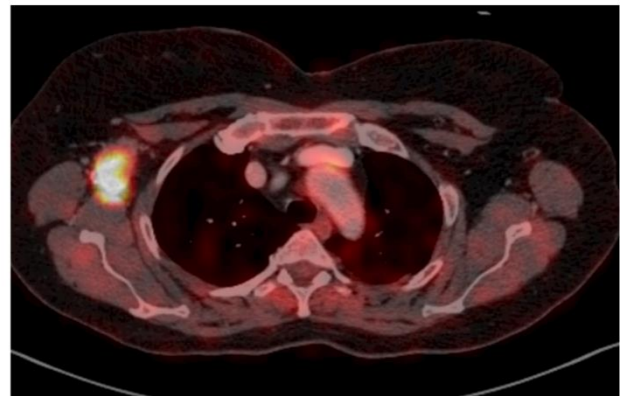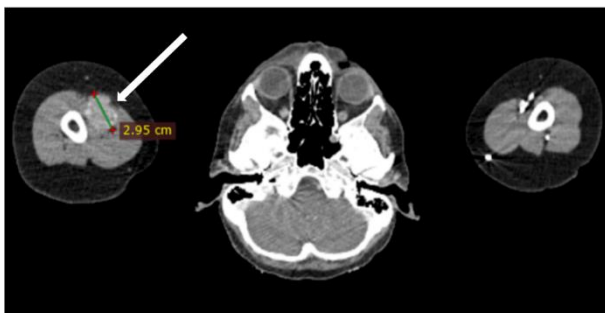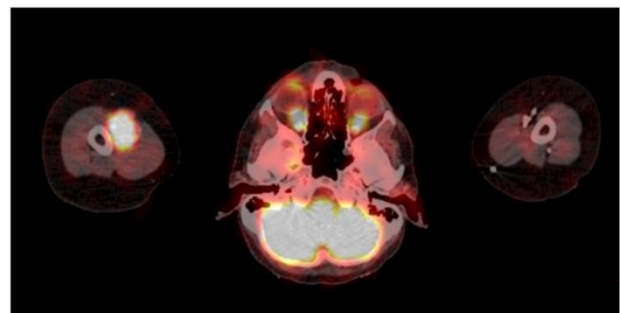

(C)

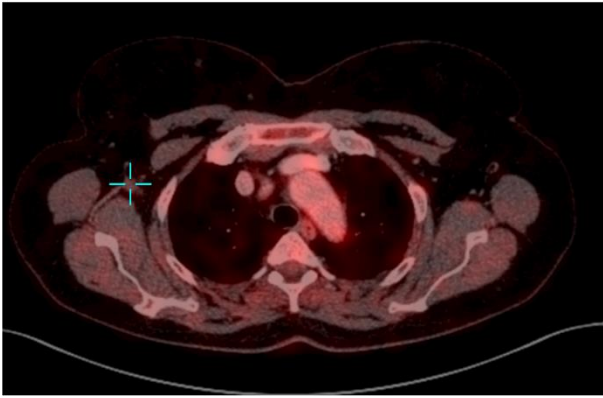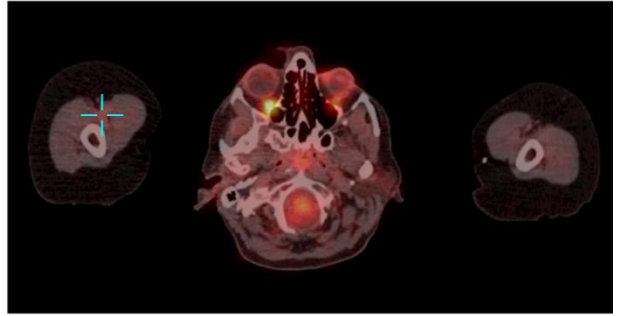

(D)

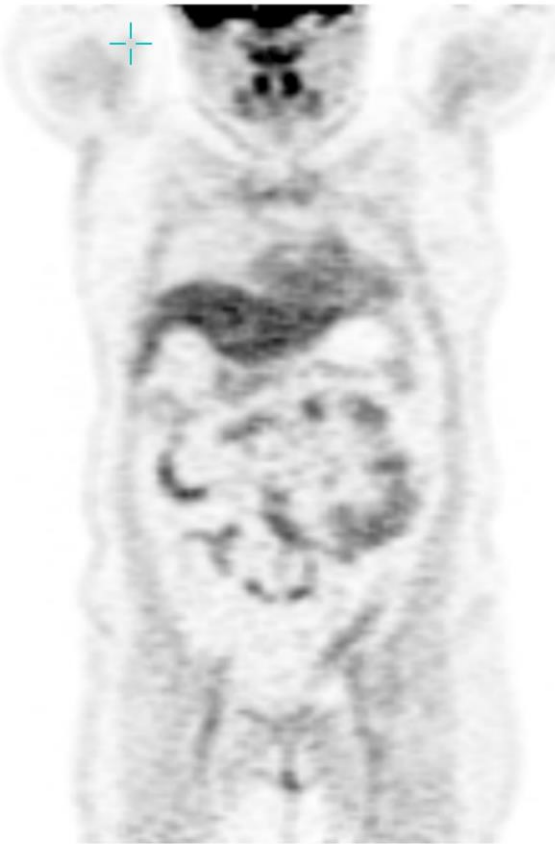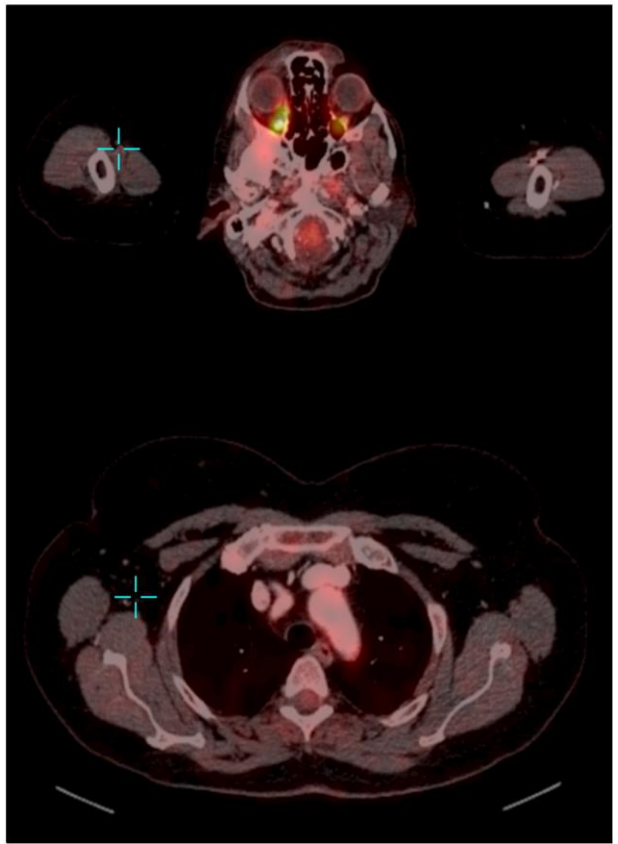

Supplement: IJC-149-1926-s001.pdf [file IJC-149-1926-s001.pdf]
